# Supplementary material for: TIGD1 Function as a Potential Cuproptosis Regulator Following a Novel Cuproptosis-Related Gene Risk Signature in Colorectal Cancer
Source: MDPI journal article supplement (doi:10.3390/cancers15082286), 2023-04-13
Supplement: s1 [file s1]

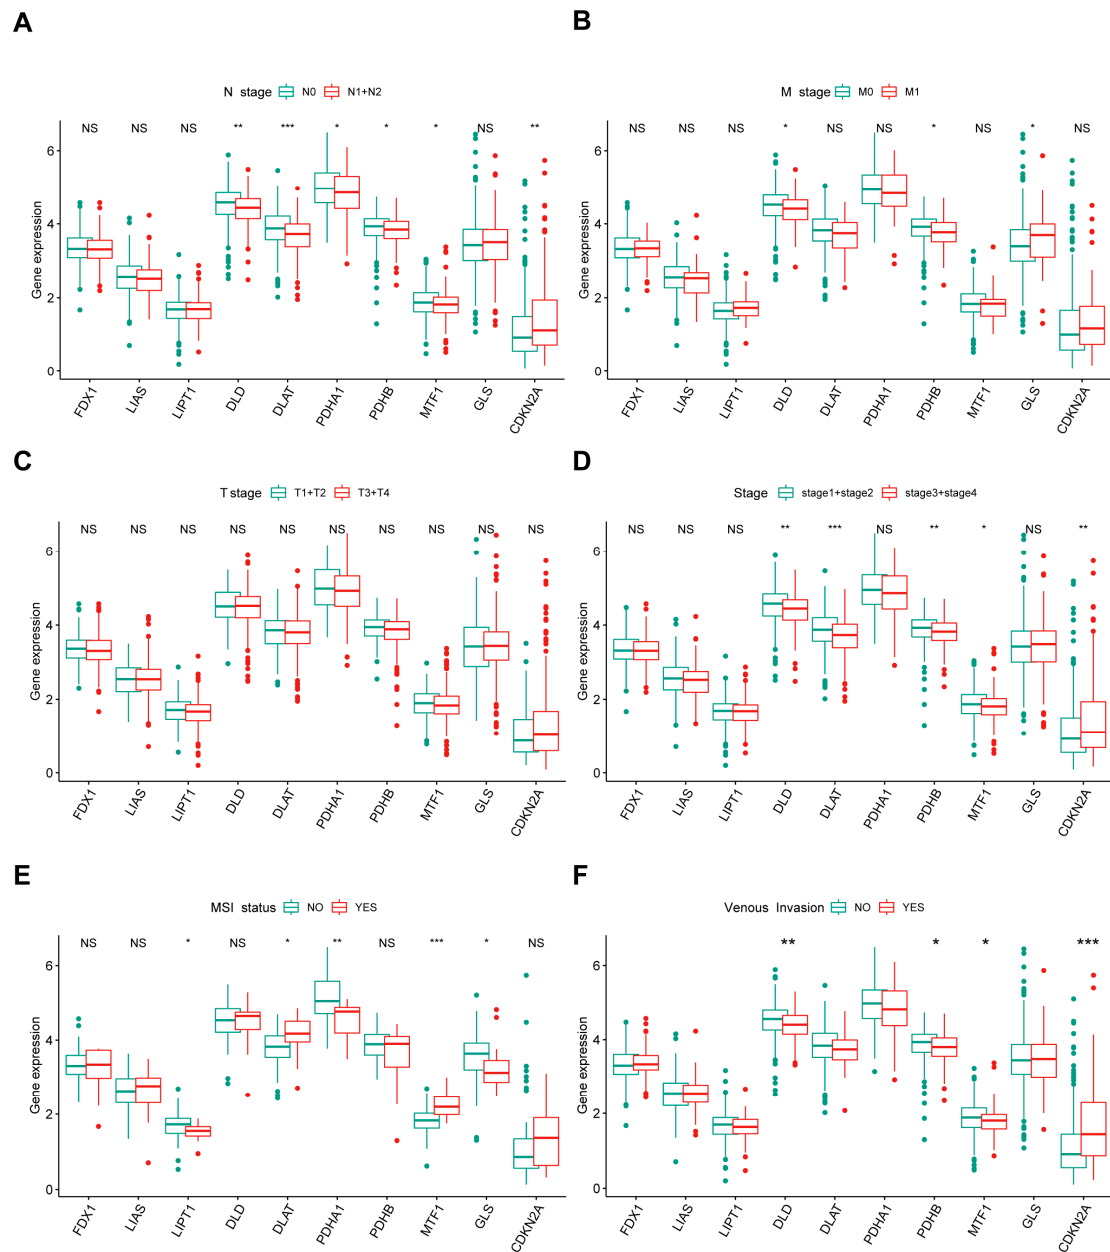

**Supplementary Figure 1** | Ten cuproptosis markers correlated with clinicopathological features in the TCGA database; (A) correlation between the ten cuproptosis markers and N stage; (B) correlation between the ten cuproptosis markers and M stage. (C) correlation between the ten cuproptosis markers and T stage; (D) correlation between the ten cuproptosis markers and tumor stage; (E) correlation between the ten cuproptosis markers and microsatellite status; (F) correlation between the ten cuproptosis markers and venous invasion condition; \* $p < 0.05$ , \*\* $p < 0.01$ , and \*\*\* $p < 0.001$ . ns, no significance



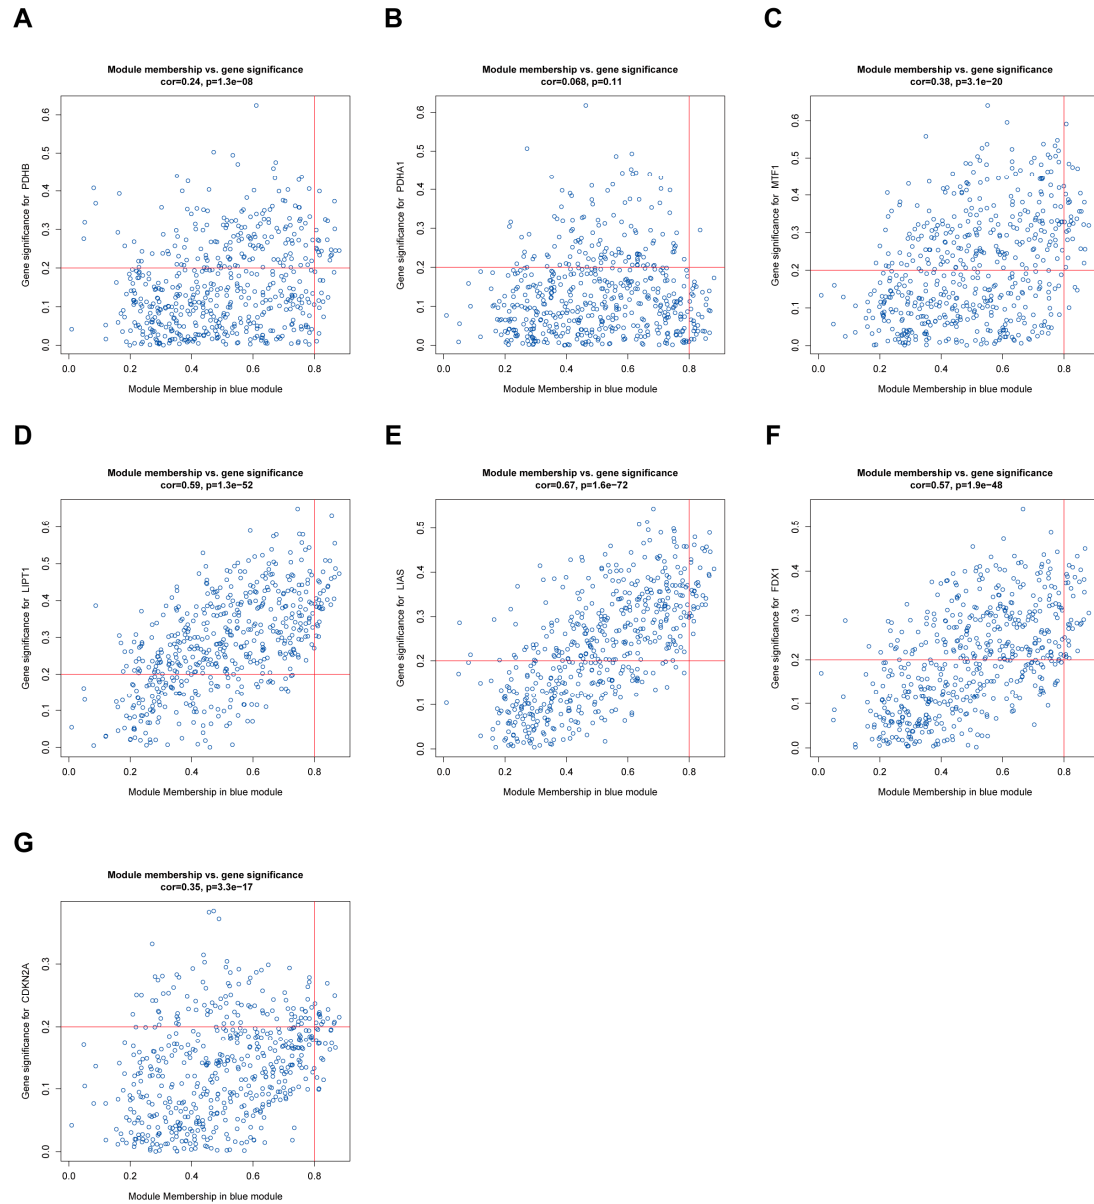

**Supplementary Figure 2** | (A–G) Scatterplots of gene significance for cuproptosis markers (PDHB, PDHA1, MTF1, LIPT1, LIAS, FDX1, and CDKN2A) vs. module members in the blue modules (each dot represents a gene)



**A**

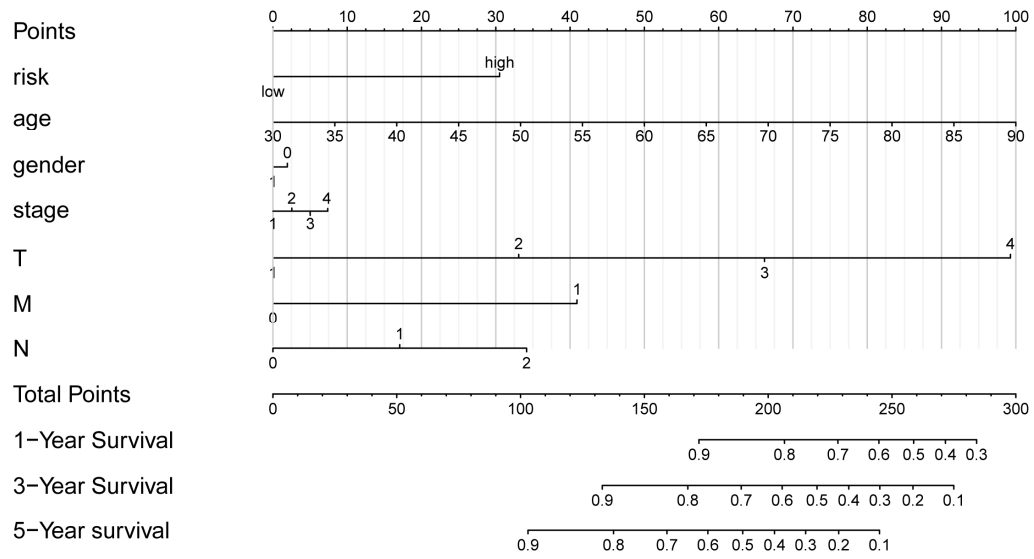

**B**

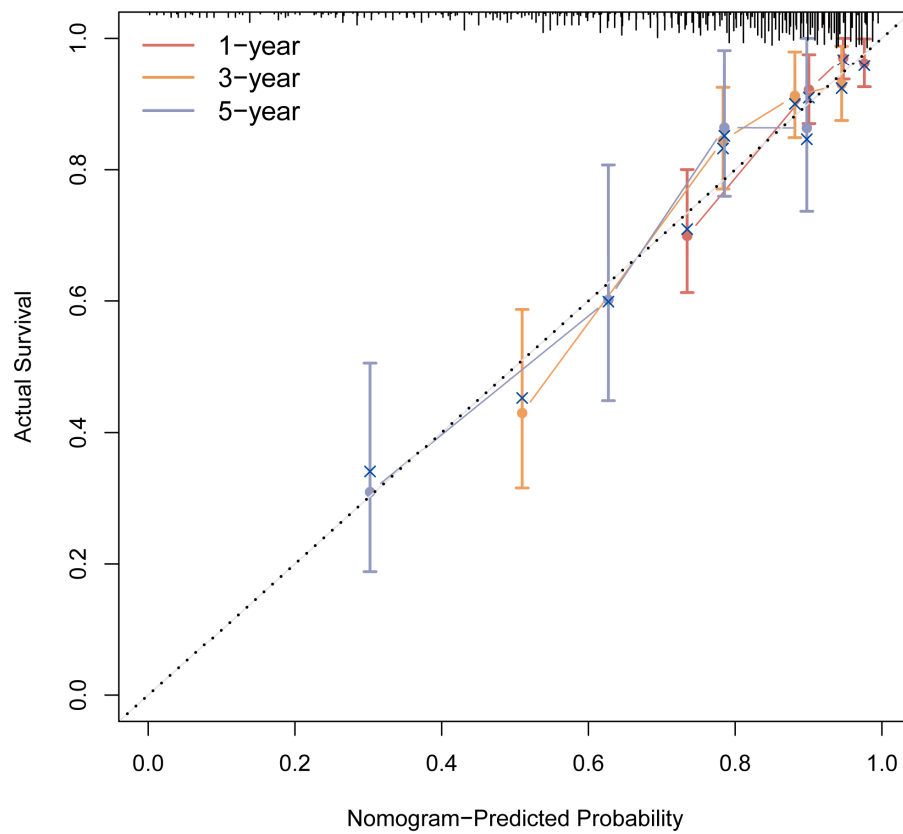

**Supplementary Figure 3** | (A) Nomogram to predict the 1-year, 3-year, and 5-year OS rates of patients with CRC; (B) calibration curve for evaluating the accuracy of the nomogram model. The dashed diagonal line in black represents the ideal nomogram.



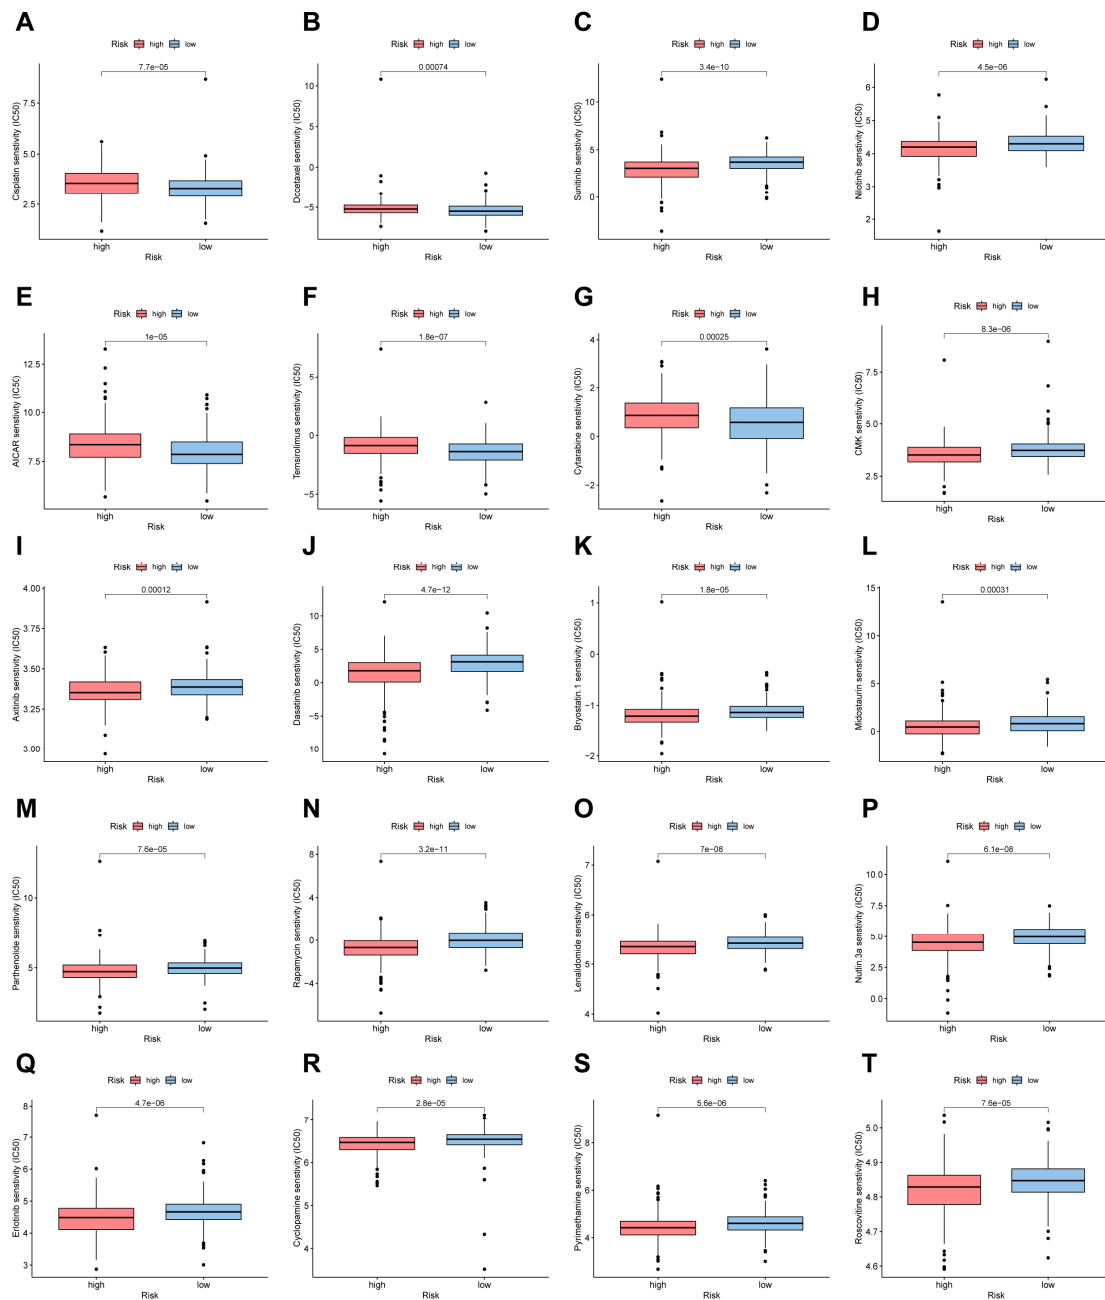

**Supplementary Figure 4 | (A–T)** Boxplots demonstrating the mean differences in estimated IC<sub>50</sub> values of 20 representative drugs (cisplatin, docetaxel, sunitinib, nilotinib, AICAR, temsirolimus, cytarabine, CMK, axitinib, dasatinib, bryostatin.1, midostaurin, parthenolide, rapamycin, lenalidomide, nutlin.3a, erlotinib, cyclopamine, pyrimethamine, and roscovitine) between the two risk groups



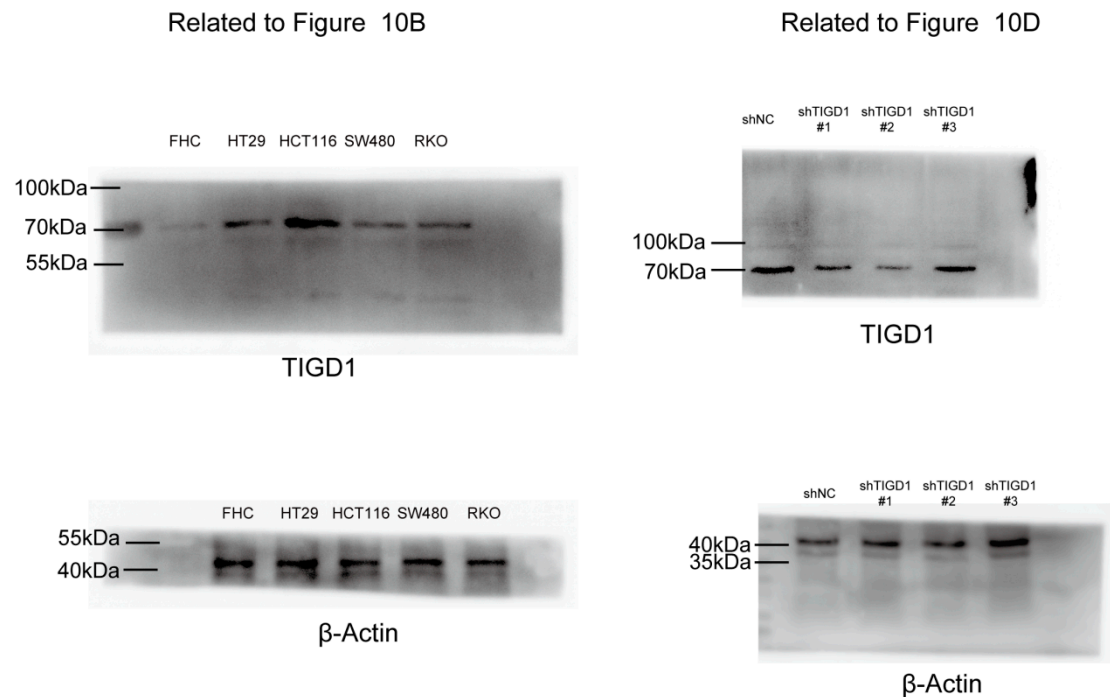

**Supplementary Figure 5 | Uncropped Western Blots for Figure 10B and Figure 10D.**

**Supplementary Table 1 | Primer sequence for qRT-PCR**

Primer

sequence

for

qRT-PCR

|            |                         |
|------------|-------------------------|
| ASPHD1-F   | GGATGGGTAGAGTGAGGCG     |
| ASPHD1-R   | AGGCAGGTCTGGTAGGAAAAG   |
| PPP1R13L-F | TGCAACGACACAGTCATCTG    |
| PPP1R13L-R | GCCCCATACTCTGCTCGAC     |
| SUCLG2-F   | CAAAAGACCCTAATGTTGTGGGA |
| SUCLG2-R   | TTCAGCAACCATCACCTTGTT   |
| KLHL35-F   | ATGGACCTAGCTGAAGTGATCG  |
| KLHL35-R   | CTCTCTGGATGGTAGGCATCG   |
| TIGD1-F    | TGCCCCTAGTCATCCAAGAG    |
| TIGD1-R    | TGTTGTGTTAGCAGGCATGAAA  |
| PMAIP1-F   | ACCAAGCCGATTTGCGATT     |
| PMAIP1-R   | ACTTGCACTTGTTCCCTCGTGG  |
| DMPK-F     | TGGCGGAGATTGTCATGGC     |
| DMPK-R     | GGATGTTGTCGGGTTTGATGTC  |
| GAPDH-F    | GGAGCGAGATCCCTCCAAAAT   |
| GAPDH-R    | GGCTGTTGTCATACTTCTCATGG |



**Supplementary Table 2 | Gene symbols in the blue module identified using WGCNA**

Gene  
symbols in  
blue  
module  
identified  
by WGCNA

|         |          |          |          |          |           |         |          |
|---------|----------|----------|----------|----------|-----------|---------|----------|
| SLC66A2 | SLC7A11  | ERCC6L   | SLC2A12  | CHRNA5   | PRC1      | ZNF239  | NFE2L3   |
| ACAT1   | TRMT6    | HSD17B11 | LGR6     | MCM8     | CCNA2     | MZT1    | EPHX4    |
| KIF24   | PAICS    | LGR4     | PDE9A    | IMPA1    | HS6ST2    | CTPS1   | CIP2A    |
| CENPU   | VSIG2    | RCBTB1   | GTF3A    | PUS7     | CHEK1     | RMDN2   | VILL     |
| MACIR   | CLCN5    | HASPIN   | EDN3     | ME1      | PTPRH     | ETHE1   | PCLAF    |
| BEST4   | JSRP1    | MTERF3   | RASD2    | RAVER2   | APOBR     | NUP62CL | MGLL     |
| SOX4    | TMEM67   | CDK20    | ENTPD8   | FIGNL1   | RRM2      | KIF23   | C2orf15  |
| STIL    | PHKA1    | PLEKHN1  | RFC3     | CENPE    | GJC2      | E2F5    | INTS13   |
| NECTIN3 | NUSAP1   | DNA2     | OSBPL3   | TBC1D31  | FCGBP     | POP1    | SQOR     |
| ATAD5   | KITLG    | ABCE1    | KIF14    | EXOSC8   | SDCBP2    | KLK12   | ENOPH1   |
| FANCI   | KIAA1549 | GNA13    | TEX30    | SINHCAF  | KCNH8     | DBF4    | MELK     |
| GRAMD2B | SKA1     | KIF4A    | LRR6     | SUCLG2   | ABHD5     | KPNA2   | ARHGEF38 |
| GABARAP | TOM1L2   | DDX55    | AUNIP    | SLC25A42 | CDC7      | FANCD2  | PIP5K1B  |
| THUMP2  | NUP58    | XPO4     | TMEM97   | NCOA4    | TGIF1     | PLCH2   | AP3S2    |
| UBE2C   | KRCC1    | CDC6     | ZNF367   | MTFR2    | RIPK2     | DDX21   | KCTD9    |
| ASPHD1  | MRPS23   | SH3BGR12 | NAA25    | MB       | PAQR5     | TGDS    | MET      |
| ZNF850  | KIAA0895 | C1orf115 | SQLE     | CGAS     | SOD3      | LGALS9C | PROSER1  |
| DIAPH3  | MMS22L   | PDCD5    | AURKA    | RNASE1   | LYPD8     | GRIN2D  | RASAL1   |
| TBC1D30 | MAD2L1   | RAP1A    | ZNF280C  | LRP8     | RACGAP1   | MIER3   | SLC7A6   |
| ECT2    | PDP1     | NANP     | PLXNA2   | PRDX6    | NFXL1     | HSPA4L  | MORC4    |
| WDR75   | TTK      | NUF2     | LTBP4    | TRIM59   | ERO1A     | A1CF    | WASL     |
| NECTIN4 | ZGRF1    | SERINC2  | NOLC1    | RPL22L1  | SYTL1     | ENC1    | CLDN1    |
| SDHD    | TDP2     | PPIL1    | RBM28    | CENPI    | SMIM14    | NCAPG2  | SGO1     |
| ATAD2   | RTN4R    | RAC3     | UGDH     | JADE3    | TNFRSF10B | SCP2    | CEP55    |
| LDHD    | CLIC3    | POLD4    | LYAR     | CASD1    | GINS4     | NEURL1  | ZER1     |
| DUS4L   | TAF1D    | LIPG     | BRCA2    | GINS1    | PDK2      | PRSS22  | GDPD2    |
| RHOF    | RBL1     | GPD1L    | FIBCD1   | BRCA1    | GRAMD1C   | TP53I3  | DMPK     |
| FGFRL1  | HSPD1    | GPSM2    | EXO1     | CDA      | KLK1      | TSEN2   | HMG2A    |
| COL17A1 | MTM1     | POLR1D   | ACVRL1   | TXLNG    | ZFYVE28   | NOP58   | PRR11    |
| RCL1    | MXI1     | B3GALT4  | UGP2     | TRAF5    | HOMER1    | LRR37A3 | HEATR1   |
| COCH    | CYP39A1  | WDR43    | C1orf112 | ECI2     | RAD54B    | ETFDH   | MALL     |
| B3GNT6  | NOC3L    | IFITM2   | CCSAP    | RPP40    | KIF18A    | TFF1    | OTUD6B   |
| MSH5    | NCR3LG1  | UGGT2    | CLSPN    | XPNEP3   | NAP1L1    | SMPD1   | GARS1    |
| CDKN3   | SMOX     | HSD17B2  | P2RX4    | PLS1     | GRPEL2    | HADHB   | POLR1B   |
| SLC6A8  | PDE4C    | PCMTD2   | PACSIN2  | RBP4     | GOLGA8B   | SCML1   | PLCD3    |
| HMMR    | STRIP2   | DCAF13   | EBPL     | SCLY     | DDIAS     | MINDY1  | CD46     |
| COL9A2  | E2F7     | TAF1A    | SLC25A32 | CENPF    | MTHFD2    | CCT6A   | TMEM41A  |



|          |           |         |          |          |          |         |          |
|----------|-----------|---------|----------|----------|----------|---------|----------|
| ZNF485   | ORC6      | PLCD1   | UHL3     | DDX31    | TMEM59   | CCNJL   | SHCBP1   |
| CENPK    | ZNF117    | IARS1   | POLR3G   | MIER1    | SPPL2A   | TEX10   | CENPA    |
| C19orf33 | ADAMTSL5  | ACE     | ZNF473   | SETD6    | APPL2    | PNPT1   | BRIX1    |
| NEIL3    | PCSK6     | ANLN    | DCUN1D5  | ACADS    | LRP11    | CMSS1   | ATP2A3   |
| SKP2     | CBX3      | URB2    | AP3M2    | CCNB1IP1 | FAM111B  | POLQ    | SLC39A10 |
| AP1S3    | PRMT3     | MMP28   | CDC14A   | PPARGC1B | TOP2A    | KNSTRN  | INAVA    |
| ANXA3    | MKI67     | WDHD1   | MSLN     | NIPAL1   | ARMC10   | KLHL35  | DDX10    |
| PACC1    | LGR5      | NCAPD3  | DNAJC2   | PBK      | HPN      | KNTC1   | GNL3     |
| MND1     | SPC25     | SESN2   | SLC9A1   | SCAMP2   | HELLS    | TIGD1   | TLCD4    |
| GOLGA7B  | SUV39H2   | MSI2    | PDE8A    | CRAT     | PSPH     | PFDN4   | KIF20B   |
| ARNTL2   | EHHADH    | PGM1    | TARBP1   | PPARD    | CDCA7    | FXDY5   | RILP     |
| TTC26    | FBLIM1    | PINK1   | IP05     | ACADM    | FZD3     | NIFK    | ZNF251   |
| PPM1H    | SNTB1     | NEK2    | SMYD3    | TPSG1    | DONSON   | WDR12   | MACC1    |
| ASPM     | MAGOHB    | PAN3    | CENPH    | PLCE1    | SLC25A27 | UBE3D   | SLC12A2  |
| NUP155   | RHBDF2    | EEF1E1  | CNN2     | PRKDC    | SLC25A29 | CENPP   | PSMG1    |
| RETSAT   | ALPI      | BLM     | STOX1    | CSE1L    | ABCD3    | TSPAN1  | TRIM29   |
| POLE2    | SERPINF2  | CCNYL1  | ITM2C    | CHD7     | PUM3     | NPM1    | RNF32    |
| SEZ6L2   | PN01      | TXNRD3  | PERP     | SCD      | DKC1     | BRIP1   | LRRC1    |
| ATP6V1E2 | MELTF     | SLC35G1 | NKRF     | GPRIN2   | HSPH1    | CDK1    | RPGRIP1L |
| BUB1     | RAD51AP1  | C5orf34 | RTKN2    | SPIN4    | ADAT2    | HAUS6   | DGKH     |
| NUDCD1   | BUB1B     | SKA3    | DEPDC1B  | PADI2    | HIGD1A   | SEMA3F  | SPDL1    |
| PRSS2    | RETREG1   | MCOLN2  | VSNL1    | PCID2    | GINS3    | CIPC    | GNG12    |
| ZC3H8    | RCN1      | ACVR1C  | SMTN     | SLC7A1   | NEBL     | CIT     | ZDHHC9   |
| PPP1R13L | EEF1AKMT1 | CDKN1A  | PROX1    | PPAT     | XPOT     | TPX2    | FMNL2    |
| CBFB     | PMAIP1    | BCAS1   | XRCC2    | DSN1     | STK17B   | URB1    | HACD3    |
| DTL      | SLC9A7    | PDCD4   | JPH1     | NCAPG    | CDK2     | POLB    | ZNF575   |
| GTPBP4   | CKAP2     | PARPBP  | ZC3HAV1L | GPR180   | ETNK1    | MTHFD1L | ZNF121   |
| CKAP2L   | XP05      | EIF2S2  | FAM169A  | CDCA2    | GOLGA8A  | GTF2F2  | TAX1BP3  |
| RFC4     | PRR36     | MTBP    | MPP6     | GGCT     | OCEL1    | PPA1    | CENPN    |
| CHPF     | DSCC1     | PTGR1   | ATP11A   | UTP14A   | VMA21    | MGAT4A  | ERV3-1   |
| RAD18    | CENPJ     | AADAT   | EZH2     | IL10RB   | AGRN     | TTYH3   |          |
| DLGAP5   | NUFIP1    | PLK4    | MCM10    |          |          |         |          |
